# Supplementary material
Source: Springer Nature journal article supplement (https://www.springermedizin.de/resource/supplementary/12958_2009_499_MOESM3_ESM.pdf/9568158)

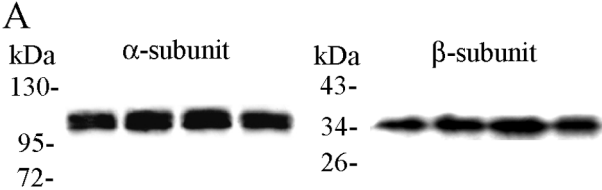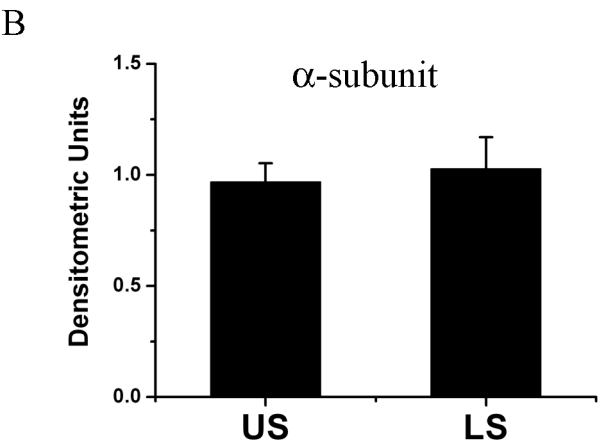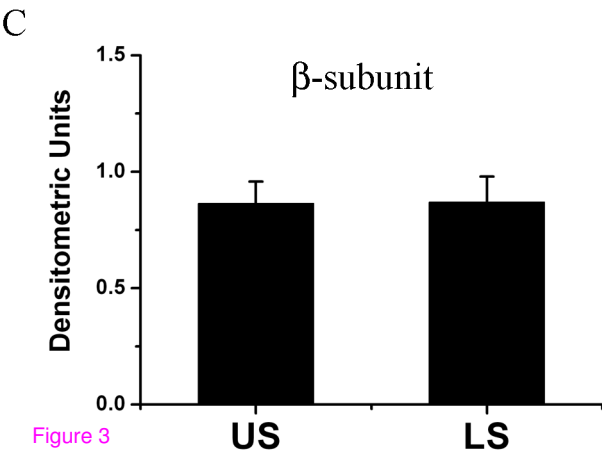

Figure 3

Supplement: MOESM3 [file 9568158]
